# Supplementary material
Source: PubMed Central journal article supplement (PMC3650328)
Supplement: supp_M112.021220_mcp.M112.021220-1.pdf [file supp_M112.021220_mcp.M112.021220-1.pdf]

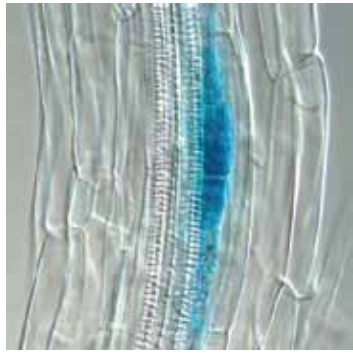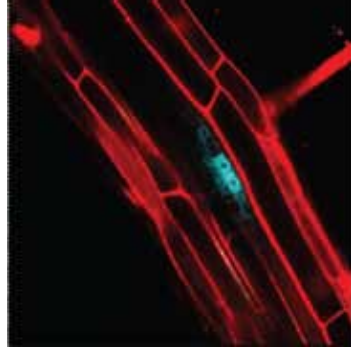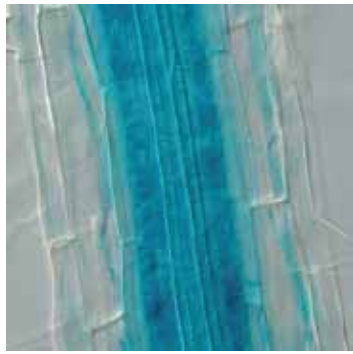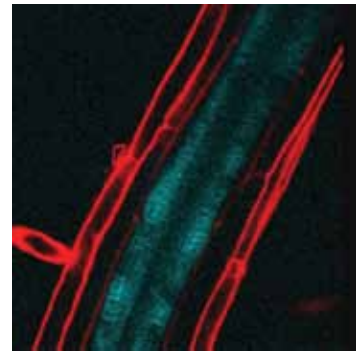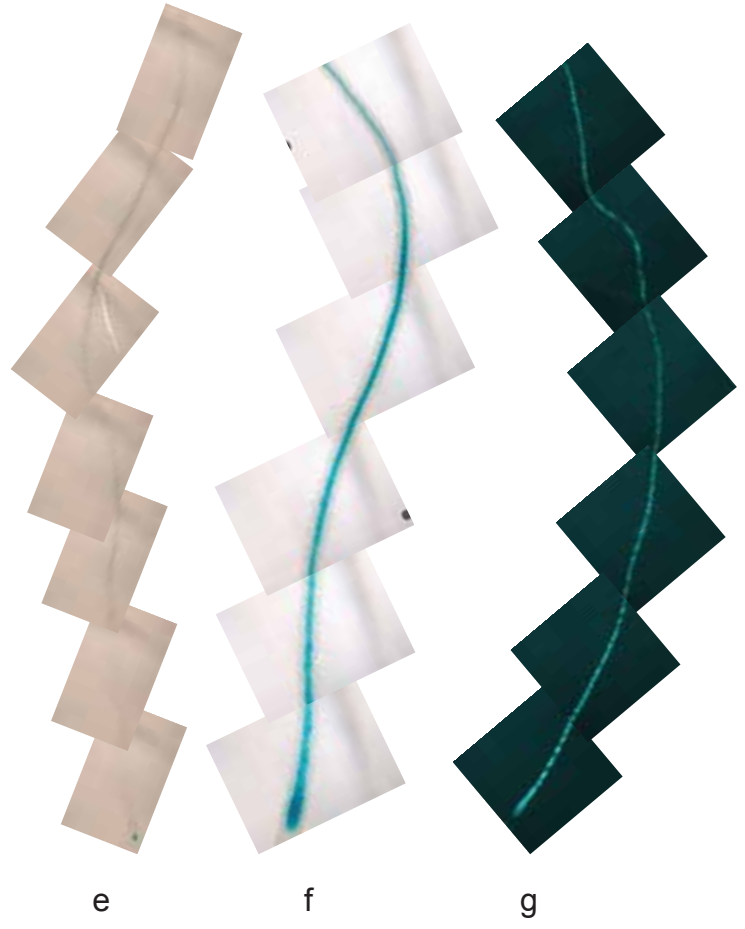

Supplementary Figure 1

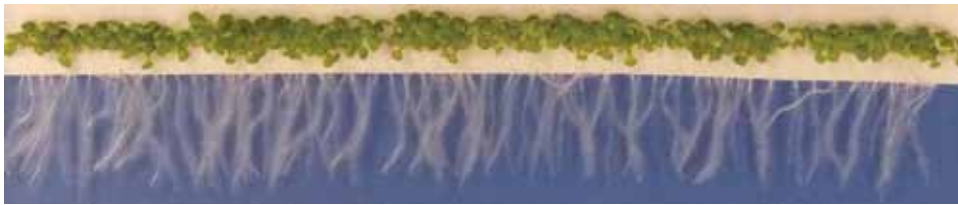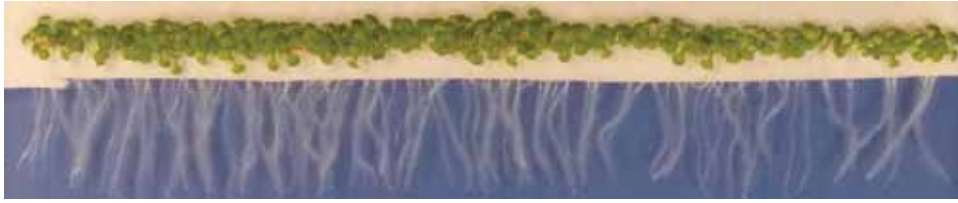

a

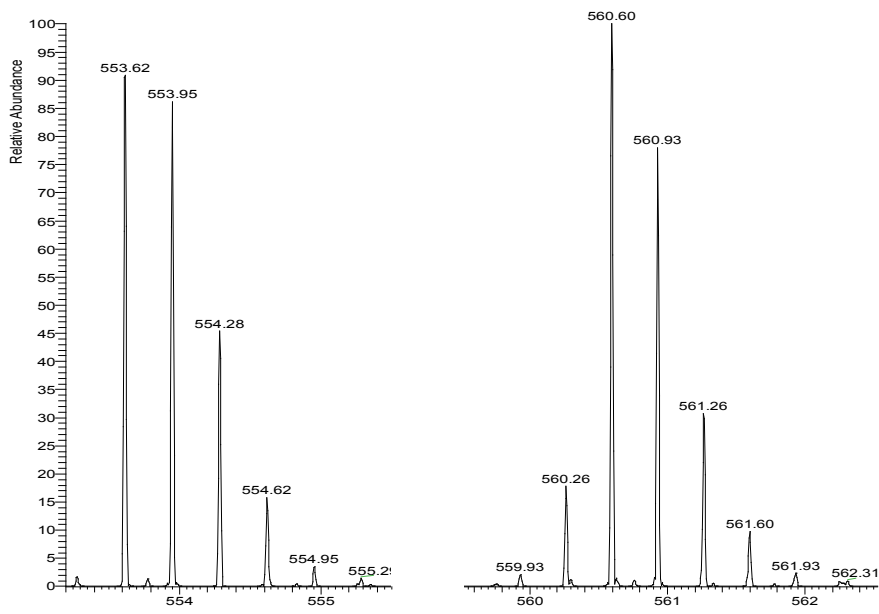

b

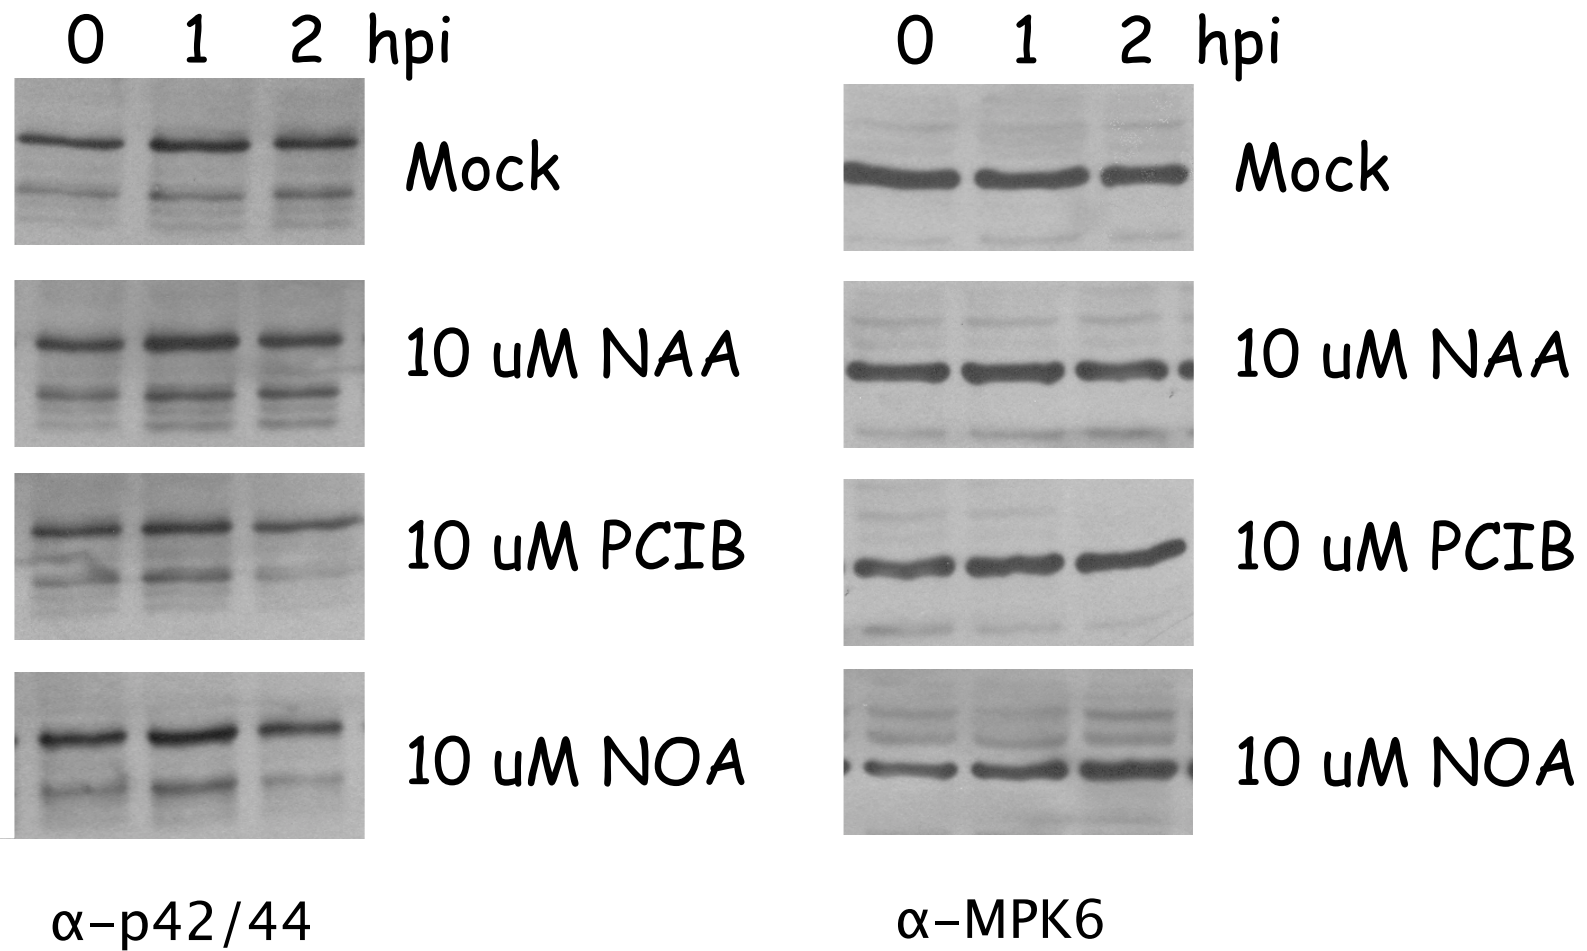

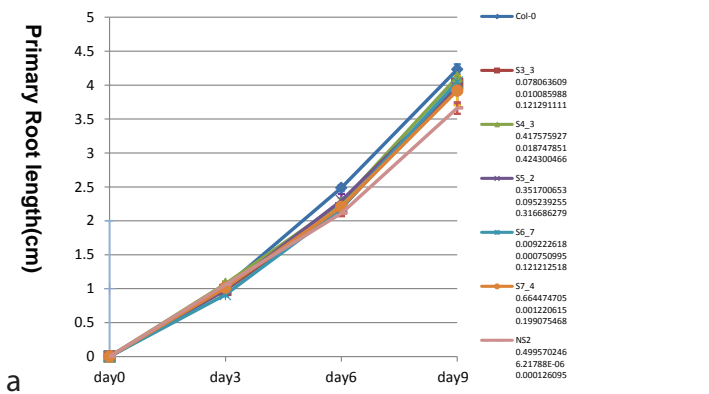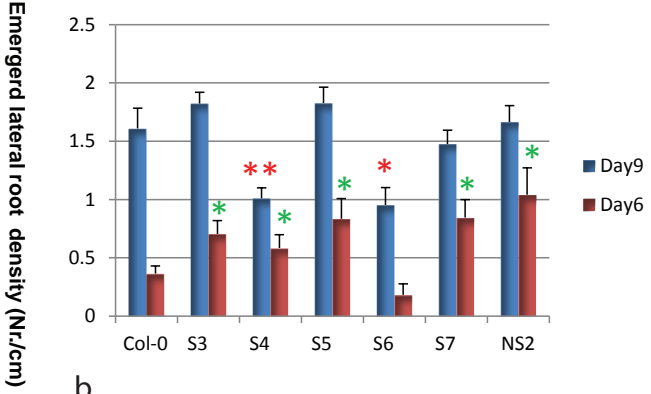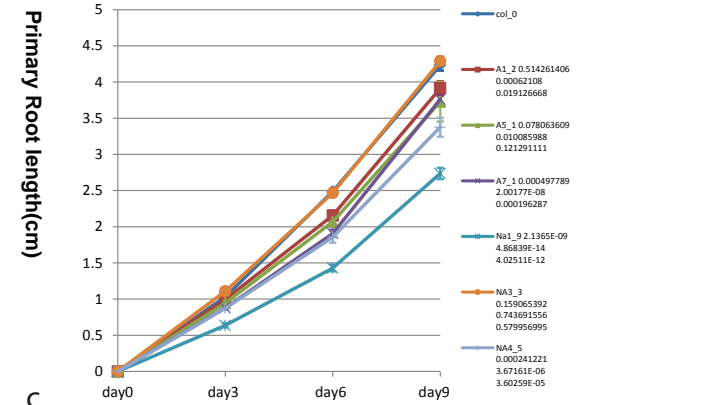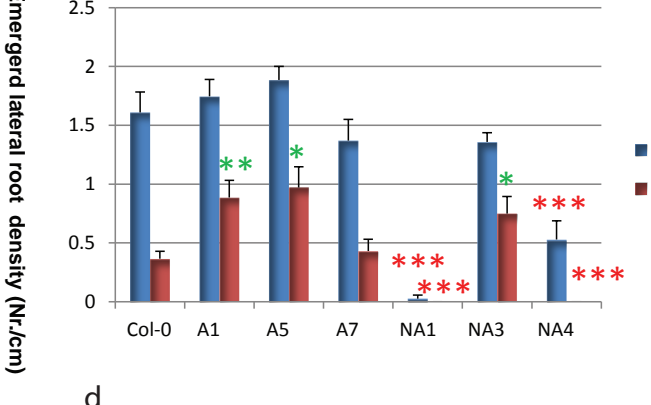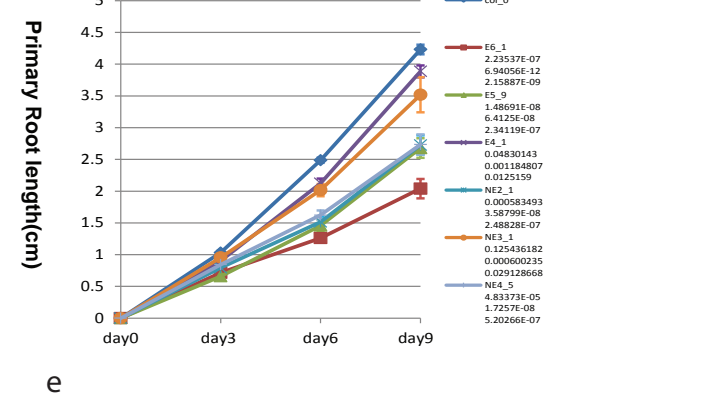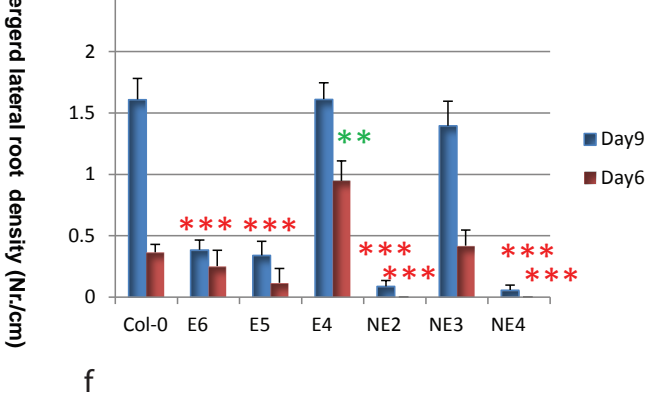

Supplementary Figure 4

SNX1GFP-S3    SNX1<sup>S16E</sup>GFP-E5

SNX1GFP-S5    SNX1<sup>S16E</sup>GFP-E6

SNX1GFP-S5    SNX1<sup>S16E</sup>GFP-E6

No induction

No induction

Induction

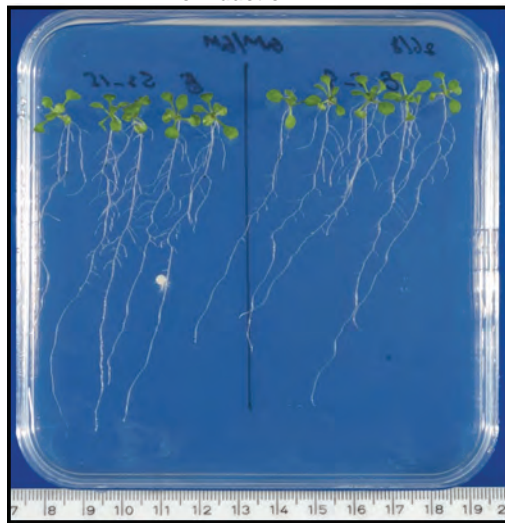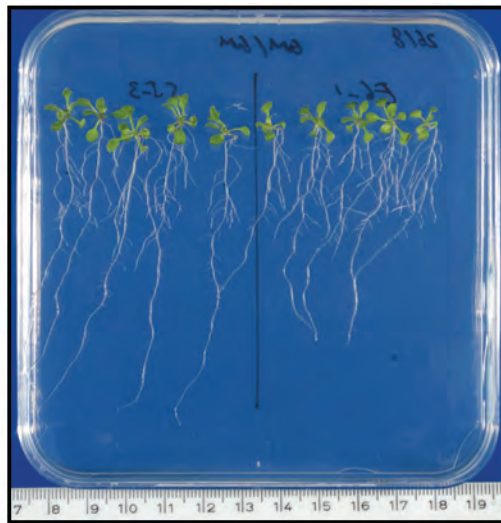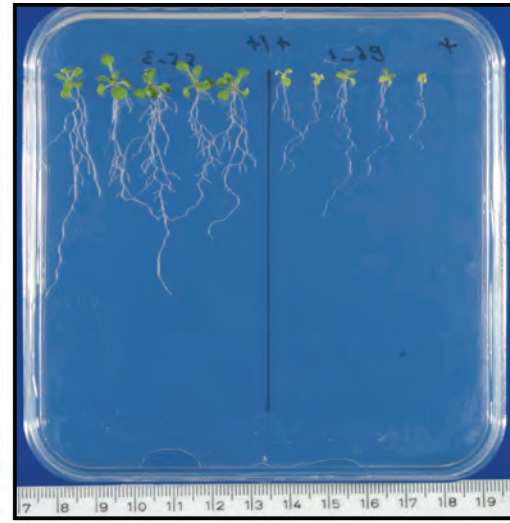

**SNX1GFP-S3**

**SNX1<sup>S16E</sup>GFP-E5**

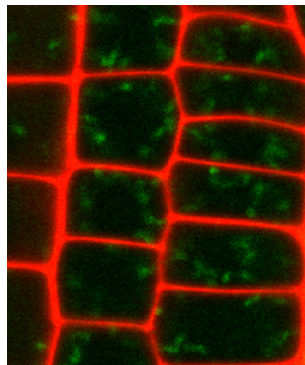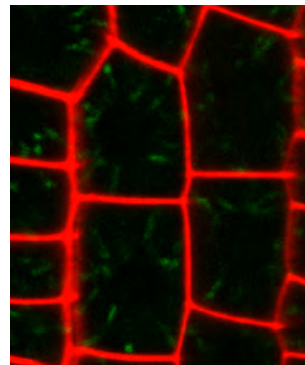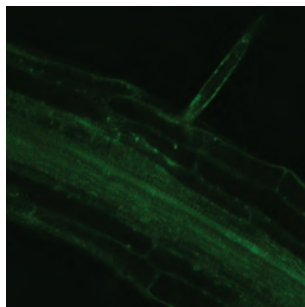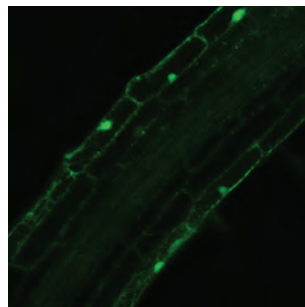

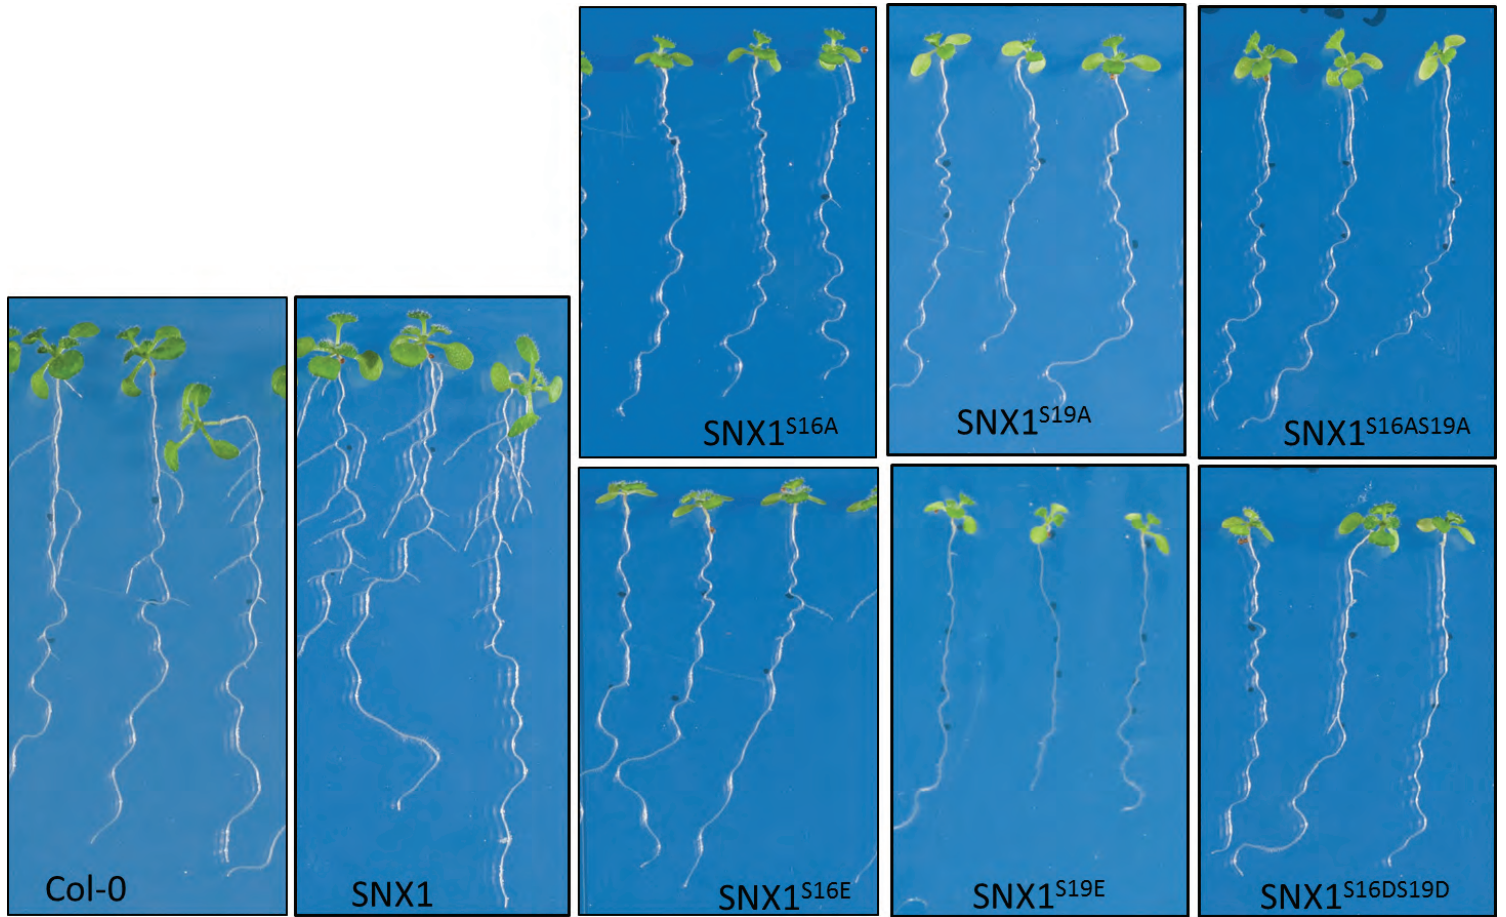

Supplementary Figure7

Suppl Table 2

PhosPhAt 4.0

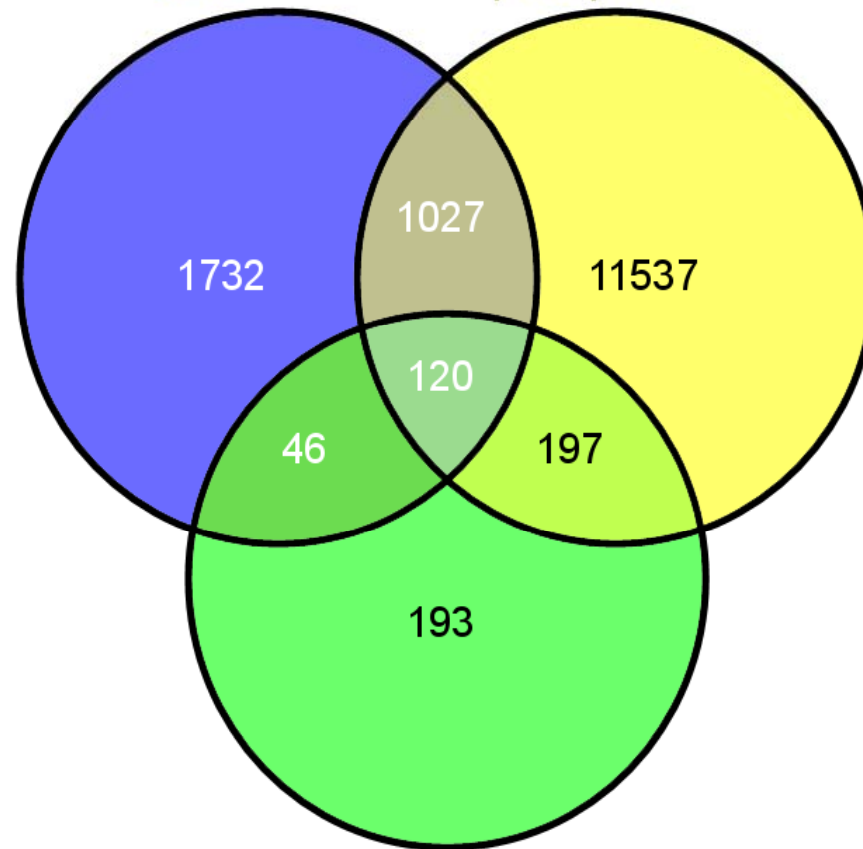

Lan et al., 2012

Supplementary figure 8



## Supplementary Table VI the primers used for cloning and mutagenesis

| GatewayATTB1SNX1_For | GGGG ACA AGT TTG TAC AAA AAA GCA GGC<br>TTTATGGAGAGCACGGAGCAGCCGA |
|----------------------|-------------------------------------------------------------------|
| GatewayATTB2SNX1_Rev | GGGG AC CAC TTT GTA CAA GAA AGC TGG<br>GTGGACAGAATAAGAAGCTTCAAG   |
| S16>A_For            | atctccggatcgatgcaggcacctagatctccgtcttcg                           |
| S16>A_Rev            | cgaagacggagatctaggtgcctgcatcgatccggagat                           |
| S16>E_For            | catctccggatcgatgcaggaacctagatctccgtcttcgc                         |
| S16>E_Rev            | gcgaagacggagatctaggtcctgcatcgatccggagatg                          |
| S19>A_For            | tccggatcgatgcagagccctagagcaccgtcttcgcatcc                         |
| S19>A_Rev            | ggatgcgaagacgggtgctctagggctctgcatcgatccgga                        |
| S19>E_For            | ccggatcgatgcagagccctagagaaccgtcttcgcat                            |
| S19>E_Rev            | atgcgaagacgggttctctagggctctgcatcgatccgg                           |
| SS>>AA_For           | catctccggatcgatgcaggcacctagagcaccgtcttcgcatccgtatc                |
| SS>>AA_Rev           | gatacggatgcgaagacgggtgctctaggtgcctgcatcgatccggagatg               |
| SS>>DD_For           | ggaacatctccggatcgatgcaggatcctagagaccgtcttcgcatccgtatctgtc         |
| SS>>DD_Rev           | gacagatacggatgcgaagacgggttctctaggatcctgcatcgatccggagatgttcc       |
